# Supplementary material
Source: PubMed Central journal article supplement (PMC2842575)
Supplement: NIHMS182252-supplement-1_si_001.pdf [file NIHMS182252-supplement-1_si_001.pdf]

# Supporting Information

## Expanding the dipeptidyl peptidase 4-regulated peptidome via an optimized peptidomics platform

Arthur D. Tinoco, Debarati M. Tagore, and Alan Saghatelian\*

Department of Chemistry and Chemical Biology, Harvard University, 12 Oxford Street,

Cambridge, Massachusetts 02138

[saghatelian@chemistry.harvard.edu](mailto:saghatelian@chemistry.harvard.edu)

**Table S1.** The charge state determines the fraction in which peptides elute from from a PolySULFOETHYL A SCX column at pH 2.6.

| <b>Protein (peptide region)</b> | <b>Peptide Sequence</b> | <b>Charge</b> | <b>Salt Fraction (mM KCl)</b> |
|---------------------------------|-------------------------|---------------|-------------------------------|
| EF-1 $\alpha$ (281-291)         | APVNVTTTEVKS            | 2             | 40                            |
| CtsB(74-86)                     | LPETFDAREQWSN           | 2             | 40                            |
| Sorbitol dehydrogenase(25-40)   | YPIPELGPN DVLLKMH       | 3             | 100                           |
| Mep $\beta$ (21-41)             | LPAPEK FVKDIDGGIDQDIFD  | 3             | 400                           |
| Atp6v1g1(107-118)               | RPEIHENYRING            | 4             | 400                           |
| DBI(92-105)                     | RPGLLDLKGKAKWD          | 5             | 400                           |

**Table S2.** Absolute fold changes of peptides identified in the salt free SCX fraction of the global peptide profiling experiments (N = 4) with *DPP4*<sup>+/+</sup> and *DPP4*<sup>-/-</sup> kidney samples. The preferred DPP4 truncation sites in the *DPP4*<sup>-/-</sup> elevated peptide sequences are highlighted in bold.

| <b>Protein (peptide region)</b>                                                 | <b>Peptide Sequence</b> | <b>Fold Change</b>                       |
|---------------------------------------------------------------------------------|-------------------------|------------------------------------------|
| <b>DPP4<sup>-/-</sup> Elevated Peptides</b>                                     |                         |                                          |
|                                                                                 |                         | DPP4 <sup>-/-</sup> /DPP4 <sup>+/+</sup> |
| Clathrin heavy chain(1662-1672)                                                 | <b>PPY</b> GQPQPGFG     | 3.88**                                   |
| Legumain(74-88)                                                                 | DDIANSEENPTPGVV         | 5.13**                                   |
| Low density lipoprotein receptor-related protein 2(4552-4559)                   | PENVENQN                | 3.02**                                   |
| Phosphatidylinositol-binding clathrin assembly protein(645-658)                 | <b>PPNP</b> FGPVSGAQIQ  | 4.77**                                   |
| Putative uncharacterized protein OS=Mus musculus GN=Dab2 PE=2 SV=1(270-279)     | <b>APAP</b> VGPLVG      | 2.86*                                    |
| Putative uncharacterized protein OS=Mus musculus GN=Pcdh24 PE=2 SV=1(1300-1308) | <b>NPGLD</b> TTDL       | 4.36**                                   |

\*, p<0.05

\*\* , p<0.01

**Table S3.** Absolute fold changes of peptides identified in the SCX-40 mM KCl fraction of the global peptide profiling experiments (N = 4) with *DPP4*<sup>+/+</sup> and *DPP4*<sup>-/-</sup> kidney samples. The preferred DPP4 truncation sites in the *DPP4*<sup>-/-</sup> elevated peptide sequences are highlighted in bold. The precursor amino acid for the *DPP4*<sup>+/+</sup> elevated peptides is shown in bold and parentheses. (M) = oxidized methionine.

| <b>Protein (peptide region)</b>                                                                                          | <b>Peptide Sequence</b>    | <b>Fold Change</b>                             |
|--------------------------------------------------------------------------------------------------------------------------|----------------------------|------------------------------------------------|
| <b>DPP4<sup>-/-</sup> Elevated Peptides</b>                                                                              |                            | <b>DPP4<sup>-/-</sup> / DPP4<sup>+/+</sup></b> |
| 60 S ribosomal protein L6(272-280)                                                                                       | <b>VPQLQGYLR</b>           | 4.11**                                         |
| ATP synthase a(88-101)                                                                                                   | <b>LPHTFTPTTQLS</b> (M)N   | 2.90**                                         |
| ATP synthase b, mitochondrial(68-80)                                                                                     | <b>VPKTGVTGPYVLG</b>       | 1.97**                                         |
| ATP synthase b, mitochondrial(68-84)                                                                                     | <b>VPKTGVTGPYVLGTGLS</b>   | 2.13**                                         |
| ATP synthase e, mitochondrial(3-13)                                                                                      | <b>PPVQVSPLIKF</b>         | 2.91**                                         |
| ATP synthase coupling factor 6, mitochondrial (90-96)                                                                    | <b>FPTFKFD</b>             | 3.43*                                          |
| Brain protein 44(90-96)                                                                                                  | <b>IPKNWSL</b>             | 2.59*                                          |
| Cathepsin B(80-88)                                                                                                       | <b>LPETFDARE</b>           | 4.22**                                         |
| Cathepsin B(80-89)                                                                                                       | <b>LPETFDAREQ</b>          | 3.02**                                         |
| Cathepsin B(80-90)                                                                                                       | <b>LPETFDAREQW</b>         | 2.09**                                         |
| Cathepsin B(80-91)                                                                                                       | <b>LPETFDAREQWS</b>        | 3.05**                                         |
| Cathepsin S(239-248)                                                                                                     | <b>LPFGDEDALK</b>          | 3.28**                                         |
| Cordon-bleu protein-like 1(1071-1086)                                                                                    | <b>LPAETSLPLVFPKPMT</b>    | 3.45**                                         |
| Cytochrome b-c1 complex subunit Rieske, mitochondrial(34-47)                                                             | <b>VPAASEPPVLDVKR</b>      | 2.51**                                         |
| Cytochrome c oxidase polypeptide 5A, mitochondrial(79-87)                                                                | <b>VPEPKIIDA</b>           | 2.00**                                         |
| Cytochrome c oxidase polypeptide 6A1, mitochondrial(84-91)                                                               | <b>KPFPWGDG</b>            | 6.25**                                         |
| Cytochrome c oxidase subunit 4 isoform 1(44-56)                                                                          | <b>YPLPVAHV TMLS</b>       | 3.31**                                         |
| Cytochrome c oxidase subunit 6B isoform 1(15-26)                                                                         | <b>APFDSRFPNQNQ</b>        | 5.42**                                         |
| Cytoplasmic dynein 1 light intermediate chain 1(505-523)                                                                 | <b>KPASVSPTTPTSPTEGEAS</b> | 2.68**                                         |
| Dihydropolyllysine-residue succinyltransferase component of 2-oxoglutarate dehydrogenase complex, mitochondrial(186-201) | <b>PPVSPSQPPSSKPVS</b>     | 4.11**                                         |

|                                                                                  |                                 |         |
|----------------------------------------------------------------------------------|---------------------------------|---------|
| Disabled homolog 2(625-634)                                                      | <b>GPLKDIPSDA</b>               | 2.65**  |
| Glyceraldehyde-3-phosphate-dehydrogenase<br>(219-227)                            | <b>IPELNGKLT</b>                | 2.45*   |
| Growth arrest-specific protein 2(219-227)                                        | <b>APSGSFFARDNTANF</b>          | 3.56**  |
| Heme-binding protein 1(66-84)                                                    | <b>VGGTNDKGVGMGMTVPVSF</b>      | 5.18**  |
| Histidine triad nucleotide-binding protein(27-34)                                | <b>IPAKIIFE</b>                 | 17.96** |
| Kinesin light chain 4(600-619)                                                   | <b>APLQVSRGLSASTVDLSSSS</b>     | 2.12**  |
| Low-density lipoprotein receptor-related<br>protein(4637-4652)                   | <b>TPGYTATEDTFKDTAN</b>         | 3.39*   |
| Lysosomal protective protein(346-354)                                            | <b>IPESLPRWD</b>                | 17.63** |
| Major Urinary Protein 6(110-117)                                                 | <b>IPKTDYDN</b>                 | 26.06** |
| Major Urinary Protein 6(110-118)                                                 | <b>IPKTDYDNF</b>                | 28.67** |
| Meprin A subunit beta(21-28)                                                     | <b>LPAPEKFV</b>                 | 40.51** |
| Microtubule-associated protein tau(195-204)                                      | <b>APVPMPLKN</b>                | 2.40**  |
| MKIAA0248 protein (fragment)(1790-1803)                                          | <b>TPRPTDPIPTSEVN</b>           | 4.37**  |
| Peptide methionine sulfide reductase(187-197)                                    | <b>GPITTDIREGQ</b>              | 2.76**  |
| Peroxiredoxin-5, mitochondrial(50-62)                                            | <b>APIKVGDAIPSVE</b>            | 3.69**  |
| Phosphatidylethanolamine-binding protein 1<br>(177-184)                          | <b>VPKLYEQL</b>                 | 4.92**  |
| Protein kinase C and casein kinase substrate<br>in neurons protein 2(340-358)    | <b>KPGSNLSVPSNPAQSTQLQ</b>      | 3.34**  |
| Protein NDRG1(122-129)                                                           | <b>LPGVLHQF</b>                 | 3.48**  |
| Protein NDRG1(375-393)                                                           | <b>TPNSGATGNNAGPKSMEVS</b>      | 3.42**  |
| Putative uncharacterized protein OS=Mus<br>musculus GN=Ubqln1 PE=2 SV=1(495-517) | <b>APSTAPSED TNPQGGTAEPGHQQ</b> | 3.19*   |
| Serine/Arginine repetitive matrix protein 2<br>(2275-2289)                       | <b>YPSSSRTPQAPTPAN</b>          | 3.04**  |
| Serum Albumin(247-258)                                                           | <b>FPNADFAEITKL</b>             | 4.05**  |
| Sorbitol dehydrogenase(25-38)                                                    | <b>YPIPELGPNDVLLK</b>           | 7.49**  |
| Sorbitol dehydrogenase(25-40)                                                    | <b>YPIPELGPNDVLLKMH</b>         | 12.48** |
| Sulfotransferase 1 C2(244-256)                                                   | <b>APKSILDQISISPF</b>           | 3.60**  |
| Triosephosphate isomerase(238-247)                                               | <b>KPEFVDIINA</b>               | 8.44**  |
| Tripeptidyl-peptidase 1(497-505)                                                 | <b>PPLGFLNPR</b>                | 10.41** |

|                                                                               |                                  |                                           |
|-------------------------------------------------------------------------------|----------------------------------|-------------------------------------------|
| Tripeptidyl-peptidase 1(497-506)                                              | <b>P</b> PLGFLNPRL               | 3.19**                                    |
| Tripeptidyl-peptidase 1(497-507)                                              | <b>P</b> PLGFLNPRLY              | 4.81**                                    |
| <b>WT Elevated Peptides</b>                                                   |                                  | DPP4 <sup>+/+</sup> / DPP4 <sup>-/-</sup> |
| Low-density lipoprotein receptor-related protein(4639-4652)                   | <b>(P)</b> GYTATEDTFKDTAN        | 3.88**                                    |
| Putative uncharacterized protein OS=Mus musculus GN=Ubqln1 PE=2 SV=1(497-517) | <b>(P)</b> STAPSEDTNPQGGTAEPGHQQ | 3.19**                                    |
| Serum Albumin(249-258)                                                        | <b>(P)</b> NADFAEITKL            | 4.05**                                    |

\*, p<0.05

\*\* , p<0.01

**Table S4.** Absolute fold changes of peptides identified in the SCX-100 mM KCl fraction of the global peptide profiling experiments (N = 4) with *DPP4*<sup>+/+</sup> and *DPP4*<sup>-/-</sup> kidney samples. The preferred DPP4 truncation sites in the *DPP4*<sup>-/-</sup> elevated peptide sequences are highlighted in bold. The precursor amino acid for the *DPP4*<sup>+/+</sup> elevated peptides is shown in bold and parentheses.

| <b>Protein (peptide region)</b>                               | <b>Peptide Sequence</b>   | <b>Fold Change</b>                       |
|---------------------------------------------------------------|---------------------------|------------------------------------------|
| <b>DPP4<sup>-/-</sup> Elevated Peptides</b>                   |                           | DPP4 <sup>-/-</sup> /DPP4 <sup>+/+</sup> |
| 40 S ribosomal protein s2(264-275)                            | <b>SPYQEFTDHLVK</b>       | 13.9*                                    |
| ATP synthase subunit b,mitochondrial(45-57)                   | <b>PPLPEYGGKVR</b> LG     | 5.91**                                   |
| cAMP-regulated phosphoprotein 19(81-97)                       | <b>APDKTEVTGDHIPTPQD</b>  | 5.26**                                   |
| Catalase(23-40)                                               | <b>RPDVLTTGGGNPIGDKLN</b> | 35.6*                                    |
| Cordon-bleu protein-like 1(404-420)                           | <b>APAPPSKTPLAQTDERN</b>  | 5.22**                                   |
| Cytochrome c oxidase polypeptide 6A1,<br>mitochondrial(84-94) | <b>KPFPWGDGNHT</b>        | 4.14**                                   |
| Cytochrome c oxidase polypeptide 6A1,<br>mitochondrial(84-95) | <b>KPFPWGDGNHTL</b>       | 5.73*                                    |
| Legumain(158-167)                                             | <b>FPNDDLHVKD</b>         | 3.59**                                   |
| Lysosomal alpha-glucosidase(810-820)                          | <b>APLDTINVHLR</b>        | 3.34*                                    |
| Peroxisome oxidin-5, mitochondrial(58-73)                     | <b>IPSVEVFEGEPGKKVN</b>   | 2.40**                                   |
| Polypyrimidine tract-binding protein 1(5-18)                  | <b>VPDIAVGTKRGSDE</b>     | 4.98*                                    |
| Profilin-1(44-58)                                             | <b>TPAEVGVLVGKDRSS</b>    | 5.20*                                    |
| Triosephosphate isomerase(238-249)                            | <b>KPEFVDIINAKQ</b>       | 3.43*                                    |
| Triosephosphate isomerase(43-55)                              | <b>PPTAYIDFARQK</b>       | 3.94**                                   |
| <b>WT Elevated Peptides</b>                                   |                           | DPP4 <sup>+/+</sup> /DPP4 <sup>-/-</sup> |
| cAMP-regulated phosphoprotein 19(83-97)                       | <b>(P)DKTEVTGDHIPTPQD</b> | 5.26**                                   |

\*, p<0.05

\*\* , p<0.01

**Table S5.** Absolute fold changes of peptides identified in the SCX-300 mM KCl free fraction of the global peptide profiling experiments (N = 4) with *DPP4*<sup>+/+</sup> and *DPP4*<sup>-/-</sup> kidney samples. The preferred DPP4 truncation sites in the *DPP4*<sup>-/-</sup> elevated peptide sequence is highlighted in bold.

| <b>Protein (peptide region)</b>                          | <b>Peptide Sequence</b>     | <b>Fold Change</b>                        |
|----------------------------------------------------------|-----------------------------|-------------------------------------------|
| <b>DPP4<sup>-/-</sup> Elevated Peptides</b>              |                             | DPP4 <sup>-/-</sup> / DPP4 <sup>+/+</sup> |
| Cytochrome c oxidase subunit 5A,<br>mitochondrial(58-76) | <b>KPDIDAWELR</b> KGMNTLVGY | 2.79**                                    |

\*, p<0.05

\*\* , p<0.01



**Table S6.** Selected peptide fractionation by off-gel electrophoresis (OGE). The peptides are from the *DPP4*<sup>+/+</sup> and *DPP4*<sup>-/-</sup> kidney peptidome. Fraction A = Lanes 1,2; B = Lanes 3,4; C = Lanes 5,6; D = Lanes 7-12.

| <b>Protein (peptide region)</b> | <b>Peptide Sequence</b> | <b>PI</b> | <b>Fraction</b> |
|---------------------------------|-------------------------|-----------|-----------------|
| Mepβ(21-41)                     | LPAPEKFKDIDGGIDQDIFD    | 3.6       | A               |
| Slc9a3r1(275-296)               | SPRPALARSASSDTSEELNSQD  | 4.1       | A               |
| EF-1α(281-291)                  | APVNVTTTEVKS            | 6.9       | C, D            |
| Slc22a12 (3-20)                 | FPELLDRVGGLGRFQ         | 7         | C               |
| Vimentin(440-460)               | RTLLIKTVETRDGQVINETSQ   | 7.1       | C               |
| Atp6v1g1(107-118)               | RPEIHENYRING            | 7.8       | D               |

**Table S7.** Absolute fold changes of peptides identified in the OGE-Lane 1-2 fraction of the global peptide profiling experiments (N = 4) with *DPP4*<sup>+/+</sup> and *DPP4*<sup>-/-</sup> kidney samples. The preferred DPP4 truncation sites in the *DPP4*<sup>-/-</sup> elevated peptide sequences are highlighted in bold.

| <b>Protein (peptide region)</b>                                | <b>Peptide Sequence</b>  | <b>Fold Change</b> |
|----------------------------------------------------------------|--------------------------|--------------------|
| <b>DPP4<sup>-/-</sup> Elevated Peptides</b>                    |                          |                    |
| Leucine-rich repeat-containing protein 4B(239-248)             | <b>L</b> PFGDEDALK       | 2.92**             |
| Low-density lipoprotein receptor-related protein 2 (4637-4652) | <b>T</b> PGYTATEDTFKDTAN | 3.19*              |
| Major urinary protein 2(110-118)                               | <b>I</b> PKTDYDNF        | 5.29**             |
| MKIAA0248 protein(1790-1803)                                   | <b>T</b> PRPTDPIPTSEVN   | 2.98*              |
| Peptide Methionine Sulfoxide(238-249)                          | <b>K</b> PEFVDIINAKQ     | 2.34**             |

\*, p<0.05

\*\* , p<0.01

**Table S8.** Absolute fold changes of peptides identified in the OGE-Lane 3-4 fraction of the global peptide profiling experiments (N = 4) with *DPP4*<sup>+/+</sup> and *DPP4*<sup>-/-</sup> kidney samples. The preferred DPP4 truncation sites in the *DPP4*<sup>-/-</sup> elevated peptide sequences are highlighted in bold. The precursor amino acid for the *DPP4*<sup>+/+</sup> elevated peptides is shown in bold and parentheses.

| <b>Protein (peptide region)</b>                                                | <b>Peptide Sequence</b>            | <b>Fold Change</b>                                 |
|--------------------------------------------------------------------------------|------------------------------------|----------------------------------------------------|
| <b><i>DPP4</i><sup>-/-</sup> Elevated Peptides</b>                             |                                    |                                                    |
| Peroxiredoxin-5, mitochondrial(58-73)                                          | <b>I</b> PSVEVFEGEPGKKVN           | DPP4 <sup>-/-</sup> /DPP4 <sup>+/+</sup><br>5.87** |
| <b><i>DPP4</i><sup>+/+</sup> Elevated Peptides</b>                             |                                    |                                                    |
| Putative uncharacterized protein OS=Mus<br>musculus GN=Dab2 PE=2 SV=1(301-323) | <b>(P)</b> STTVVPGAIISGQPPSFGQPLVF | DPP4 <sup>+/+</sup> /DPP4 <sup>-/-</sup><br>7.15** |

\*, p<0.05

\*\* , p<0.01

**Table S9.** Absolute fold changes of peptides identified in the OGE-Lane 5-6 fraction of the global peptide profiling experiments (N = 4) with WT and DPP4<sup>-/-</sup> kidney samples. The preferred DPP4 truncation sites in the DPP4<sup>-/-</sup> elevated peptide sequences are highlighted in bold.

| Protein (peptide region)                                                   | Peptide Sequence         | Fold Change                               |
|----------------------------------------------------------------------------|--------------------------|-------------------------------------------|
| <b>DPP4<sup>-/-</sup> Elevated Peptides</b>                                |                          |                                           |
|                                                                            |                          | DPP4 <sup>-/-</sup> / DPP4 <sup>+/+</sup> |
| 3-hydroxyanthranilate-3,4-dioxygenase(158-173)                             | <b>KPNPDQLLKELPFPLN</b>  | 4.13**                                    |
| Alpha-globin transcription factor CP2(108-115)                             | <b>LPELNGKL</b>          | 5.49**                                    |
| ATP synthase-coupling factor 6, mitochondrial (90-96)                      | <b>FPTFKFD</b>           | 7.74*                                     |
| Cytochrome b-c1 complex subunit Rieske, mitochondrial(34-50)               | <b>VPAASEPPVLDVKRPFL</b> | 3.24**                                    |
| Cytochrome c oxidase polypeptide 6A1(49-57)                                | <b>LPGVGVSMML</b>        | 2.01**                                    |
| Fructose-bisphosphate aldolase B(5-13)                                     | <b>FPALTPEQK</b>         | 26.5**                                    |
| Microtubule-associated protein tau(538-546)                                | <b>APVMPDLK</b>          | 6.69**                                    |
| Non-specific lipid-transfer protein(466-480)                               | <b>GPGGKEATWVVDVKN</b>   | 3.40**                                    |
| PDZK1-interacting protein 1(90-113)                                        | FRSSEHKAYENVLEEEGRVSRSTP | 7.92**                                    |
| Putative uncharacterized protein OS=Mus musculus GN=Prodh PE=2 SV=1(22-38) | <b>KPQAQEQPPASPEALRG</b> | 4.02*                                     |
| Solute carrier family 22 member 12(3-17)                                   | <b>FPELLDRVGGGLGRFQ</b>  | 4.74**                                    |

\*, p<0.05

\*\* , p<0.01

**Table S10.** Absolute fold changes of peptides identified in the OGE-Lane 7-12 fraction of the global peptide profiling experiments (N = 4) with WT and DPP4<sup>-/-</sup> kidney samples. The preferred DPP4 truncation sites in the DPP4<sup>-/-</sup> elevated peptide sequences are highlighted in bold.

| <b>Protein (peptide region)</b>                                     | <b>Peptide Sequence</b>    | <b>Fold Change</b>                        |
|---------------------------------------------------------------------|----------------------------|-------------------------------------------|
| <b>DPP4<sup>-/-</sup> Elevated Peptides</b>                         |                            | DPP4 <sup>-/-</sup> / DPP4 <sup>+/+</sup> |
| Collectrin(18-29)                                                   | <b>HPDAENAFKVRL</b>        | 2.89*                                     |
| Cytochrome c oxidase polypeptide 6A1(84-95)                         | <b>KPFPWGDGNHTL</b>        | 3.65**                                    |
| Protein kinase c and kinase substrate in neurons protein 2(340-358) | <b>KPGSNLSVPSNPAQSTQLQ</b> | 10.9**                                    |

\*, p<0.05

\*\* , p<0.01

**Table S11.** *DPP4*<sup>-/-</sup> elevated kidney peptides detected by application of either SCX or OGE electrophoresis fractionation during 2D fractionation, which were also detected by standard 1D RP-HPLC MS methods. The preferred *DPP4* truncation sites in the *DPP4*<sup>-/-</sup> elevated peptide sequences are highlighted in bold.

| <b>SCX Fractionation</b>               | <b>OGE Electrophoresis Fractionation</b>            |
|----------------------------------------|-----------------------------------------------------|
| Atp6v1g1(107-118) <b>R</b> PEIHENYRING | Atp6v1g1(107-118) <b>R</b> PEIHENYRING              |
| CtsB(74-86) <b>L</b> PETFDAREQWSN      | Mepβ(21-41) <b>LPA</b> PEKFKDIDGGIDQDIFD            |
| EF-1α(281-291) <b>AP</b> VNVTTEVKS     | Slc9a3r1(275-296)<br><b>SPR</b> PALARSASSDTSEELNSQD |
| Mepβ(21-28) <b>LPA</b> PEKFV*          | Slc22a12(3-20) <b>F</b> PELLDRVGGLGRFQ              |

\* = Partial Match

**Table S12.** Absolute fold changes of peptides identified in the salt free SCX fraction of the global peptide profiling experiments (N = 4) with *DPP4*<sup>+/+</sup> and *DPP4*<sup>-/-</sup> gut samples applying SCX-RP-peptidomics workflow. The preferred DPP4 truncation sites in the *DPP4*<sup>-/-</sup> elevated peptide sequences are highlighted in bold.

| <b>Protein (peptide region)</b>             | <b>Peptide Sequence</b>    | <b>Fold Change</b>                        |
|---------------------------------------------|----------------------------|-------------------------------------------|
| <b>DPP4<sup>-/-</sup> Elevated Peptides</b> |                            | DPP4 <sup>-/-</sup> / DPP4 <sup>+/+</sup> |
| Chymotrypsinogen B(21-28)                   | <b>V</b> PAIQPVL           | 5.86**                                    |
| Chymotrypsinogen B(21-28)                   | <b>V</b> PAIQPVL <b>TG</b> | 9.83*                                     |
| VIP Peptides(26-33)                         | <b>W</b> PLFGPPS           | 1.91*                                     |

\*, p<0.05

\*\* , p<0.01

**Table S13.** Absolute fold changes of peptides identified in the SCX-40 mM KCl free fraction of the global peptide profiling experiments (N = 4) with *DPP4*<sup>+/+</sup> and *DPP4*<sup>-/-</sup> mice guts applying SCX-RP-peptidomics workflow. The preferred DPP4 truncation sites in the *DPP4*<sup>-/-</sup> elevated peptide sequences are highlighted in bold.

| <b>Protein (peptide region)</b>                                    | <b>Peptide Sequence</b>   | <b>Fold Change</b> |
|--------------------------------------------------------------------|---------------------------|--------------------|
| <b>DPP4<sup>-/-</sup> Elevated Peptides</b>                        |                           |                    |
| 40 S ribosomal protein S20(9-19)                                   | TPVEPEVAIHR               | 4.93*              |
| Actin, cytoplasmic 2(31-38)                                        | FPSIVGRP                  | 5.68*              |
| Actin, cytoplasmic 2(242-254)                                      | LPDGQVITIGNER             | 6.30*              |
| Alpha-actinin-4(885-901)                                           | <b>APYQGPDAAPGALDYKS</b>  | 4.94*              |
| Alpha-actinin-4(885-902)                                           | <b>APYQGPDAAPGALDYKSF</b> | 6.03*              |
| Cathepsin B(80-89)                                                 | LPETFDAREQ                | 1.64**             |
| Ezrin-radixin-moesin-binding phosphoprotein 50<br>(240-254)        | IPSQEHLDGPLPEPF           | 6.39*              |
| Glyceraldehyde-3-phosphate dehydrogenase<br>(219-228)              | IPELNGKTG                 | 14.95*             |
| Inorganic pyrophosphatase(276-283)                                 | LPTDVVKW                  | 4.32*              |
| Junction plakoglobin(709-717)                                      | VPLDPLDMH                 | 11.13**            |
| Profilin-1(44-54)                                                  | TPAEVGVLVGK               | 6.45*              |
| Putative uncharacterized protein GN=Pdlim1,<br>PE=1, SV=1(130-147) | <b>SPAPSTRVITNQYNSPTG</b> | 2.29*              |
| Tripeptidyl-peptidase 1(497-507)                                   | <b>PPLGFLNPRLY</b>        | 2.31*              |
| Tubulin alpha-1B chain(71-83)                                      | <b>EPTVIDEVRTGTY</b>      | 1.80*              |
| Uncharacterized protein C19orf21(479-490)                          | <b>VPDVPQGTETPH</b>       | 3.04*              |

\* , p<0.05

\*\* , p<0.01



**Table S14.** Absolute fold changes of peptides identified in the SCX-100 mM KCl free fraction of the global peptide profiling experiments (N = 4) with *DPP4*<sup>+/+</sup> and *DPP4*<sup>-/-</sup> gut samples applying SCX-RP-peptidomics workflow. The preferred DPP4 truncation sites in the *DPP4*<sup>-/-</sup> elevated peptide sequences are highlighted in bold.

| <b>Protein (peptide region)</b>                                | <b>Peptide Sequence</b>      | <b>Fold Change</b>                        |
|----------------------------------------------------------------|------------------------------|-------------------------------------------|
| <b>DPP4<sup>-/-</sup> Elevated Peptides</b>                    |                              | DPP4 <sup>-/-</sup> / DPP4 <sup>+/+</sup> |
| Defensin-related cryptdin-5(20-33)                             | <b>DPIHKTDEETNTEE</b>        | 6.27*                                     |
| Histone H2B type 1-M(110-122)                                  | <b>HAVSEGTKAVTKY</b>         | 10.55**                                   |
| Plasminogen activator inhibitor 1 RNA-binding protein(112-126) | <b>RPDQQLQGDGKLIDR</b>       | 7.94*                                     |
| Putative uncharacterized protein GN=Tf, PE=2, SV=1(94-114)     | <b>GREEKPAASDSSGKQSTQVMA</b> | 18.86**                                   |
| Secretogranin-1(21-35)                                         | <b>APVDNRDHNEEMVTR</b>       | 29.85*                                    |

\*, p<0.05

\*\* , p<0.01

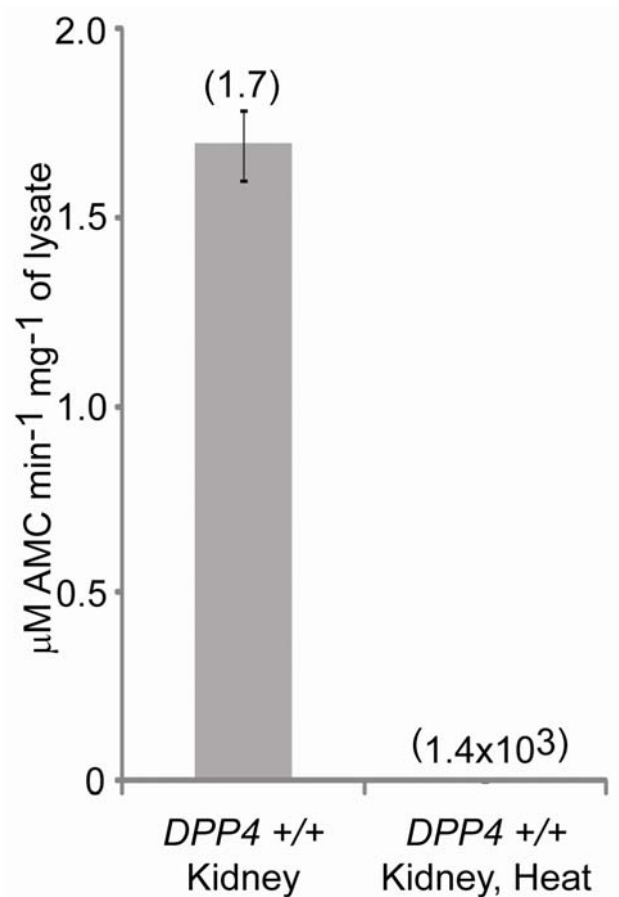

*Figure S1.* Measurement of DPP4 activity from kidney lysates. Kidney samples were dounced homogenized in 25 mM Tris-HCl, 140 mM NaCl, 10 mM KCl, pH 7.5, 0.1% BSA followed by centrifugation at 20,800 x g for 20 min at 4 °C. Heat treated samples were microwaved in water at high power for 2 min prior to homogenization. The lysate concentrations were obtained using a Bradford assay and the activity assay was run in the same buffer that was used to dounce the samples using 50 µg of total protein (100 µL of a 0.5 mg mL<sup>-1</sup> lysate) and 22.5 µM of the substrate, H-GlyPro-AMC (aminomethylcoumarin), in a final volume of 100 µL. The reaction was monitored by measuring the fluorescence increase associated with the liberation of the AMC group at 360 nm using a Spectramax plate reader. A standard curve was run with each sample and used to determine the absolute amount of AMC generated during the reaction. These results show that pre-heating samples is able to inactivate DPP4. Actual values for peak heights are given in parenthesis above each bar.

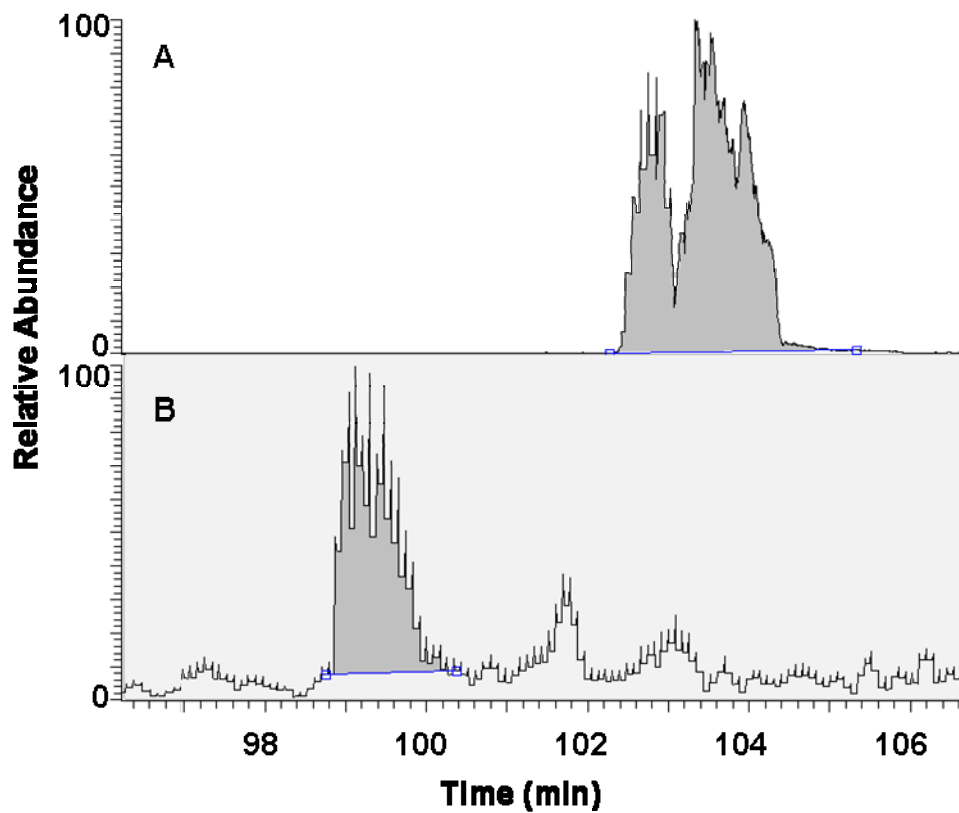

*Figure S2.* Peak integration of the leucine heavy-label peptide standard, RPGL\*L\*DL\*KGKAKWD, in the presence (area:  $5.6 \pm 0.4 \times 10^6$ ) and absence (area:  $66.5 \pm 4.2 \times 10^6$ ) of *DPP4*<sup>-/-</sup> sample background.

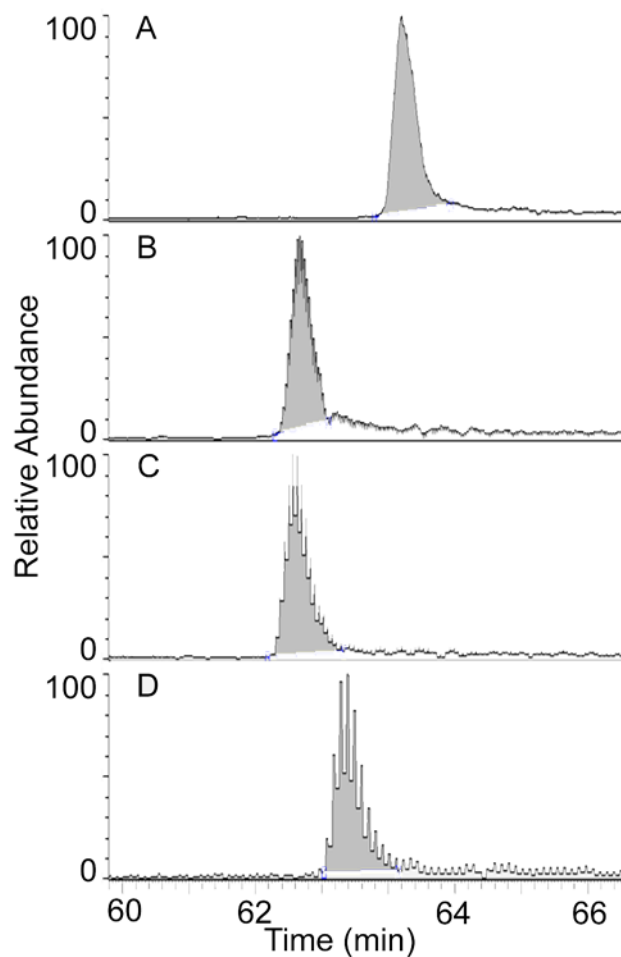

*Figure S3.* Comparison of the shape and areas of the MS peak for the vacuolar H<sup>+</sup> ATPase, G1 subunit peptide RPEIHENYRING (z: +3; m/z: 499.92) collected in- A) Full MS (Most Gaussian peak shape; Area:  $3.3 \times 10^7$ ), B) Top 3 tandem MS (Area:  $7.9 \times 10^6$ ), C) Top 6 tandem MS (Area:  $6.3 \times 10^6$ ), and D) Top 10 tandem MS (Least Gaussian peak shape; Area:  $3.2 \times 10^6$ ) modes. As peak shape becomes more jagged (i.e., top-to-bottom) XCMS cannot accurately identify and integrate peaks. Therefore, samples are run using full MS (top) for accurate ion quantification by XCMS.

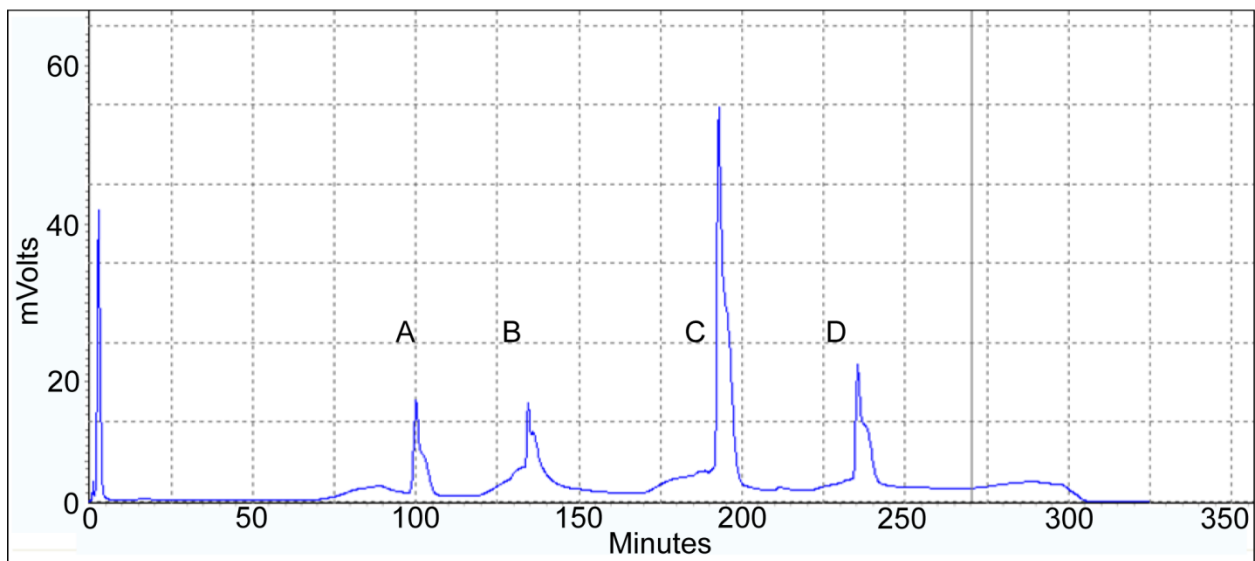

*Figure S4.* Order of peptide elution from a PolySULFOETHYL A™ SCX column- Fraction A (40 mM KCl): LPLFDRVLVE, +2; Fraction B (100 mM KCl): LPAPEKFKDIDGGIDQDIFD, +3; Fraction C (200 mM KCl) GLLDLKGGKAKWD, +4; and Fraction D (400 mM KCl): RPGLLDLKGKAKWD, +5.
